# Supplementary material for: Pandemic Fatigue and Vaccine Hesitancy among People Who Have Recovered from COVID-19 Infection in the Post-Pandemic Era: Cross-Sectional Study in China
Source: MDPI journal article supplement (doi:10.3390/vaccines11101570), 2023-10-05
Supplement: s1 [file s1]

**Supplemental File****Table S1.** Collection of valid questionnaires by region in mainland China.

| <b>Regions</b>                   | <b>Number</b> | <b>Proportion(%)</b> |
|----------------------------------|---------------|----------------------|
| Anhui Province                   | 130           | 4.42                 |
| Beijing                          | 47            | 1.60                 |
| Chongqing                        | 66            | 2.24                 |
| Fujian Province                  | 86            | 2.92                 |
| Gansu Province                   | 48            | 1.63                 |
| Guangdong Province               | 266           | 9.04                 |
| Guangxi Province                 | 106           | 3.60                 |
| Guizhou Province                 | 82            | 2.79                 |
| Hainan Province                  | 21            | 0.71                 |
| Hebei Province                   | 158           | 5.37                 |
| Heilongjiang Province            | 65            | 2.21                 |
| Henan Province                   | 208           | 7.07                 |
| Hubei Province                   | 123           | 4.18                 |
| Hunan Province                   | 140           | 4.76                 |
| Jiangsu Province                 | 180           | 6.12                 |
| Jiangxi Province                 | 95            | 3.23                 |
| Jilin Province                   | 51            | 1.73                 |
| Liaoning Province                | 91            | 3.09                 |
| Ningxia Province                 | 14            | 0.48                 |
| Qinghai Province                 | 11            | 0.37                 |
| Shaanxi Province                 | 84            | 2.86                 |
| Shandong Province                | 214           | 7.27                 |
| Shanghai                         | 53            | 1.80                 |
| Shanxi Province                  | 74            | 2.52                 |
| Sichuan Province                 | 177           | 6.02                 |
| Nei Monggol Autonomous Region    | 50            | 1.70                 |
| Xinjiang Uygur Autonomous Region | 53            | 1.80                 |
| Tianjin                          | 30            | 1.02                 |
| Tibet                            | 7             | 0.24                 |
| Yunnan Province                  | 75            | 2.55                 |
| Zhejiang Province                | 137           | 4.66                 |

**Table S2.** Subgroup analysis of the association between pandemic fatigue and COVID-19 vaccine hesitancy among 2942 participants recovered from COVID-19 in China.

| Characteristics†         | Low              | Moderate          | High                | P for interaction |
|--------------------------|------------------|-------------------|---------------------|-------------------|
|                          | pandemic fatigue | pandemic fatigue  | pandemic fatigue    |                   |
|                          | OR (95%CI)       | OR (95%CI)        | OR (95%CI)          |                   |
| Sex                      |                  |                   |                     | 0.750             |
| Male                     | Reference        | 2.99 (2.24, 3.99) | 7.00 (4.93, 9.95)   |                   |
| Female                   | Reference        | 2.97 (2.35, 3.75) | 7.04 (5.20, 9.53)   |                   |
| Age (years)              |                  |                   |                     | 0.263             |
| <30                      | Reference        | 2.69 (2.07, 3.49) | 5.42 (3.87, 7.60)   |                   |
| 30-34                    | Reference        | 3.83 (2.64, 5.56) | 10.96 (6.98, 17.20) |                   |
| 35-39                    | Reference        | 3.34 (2.02, 5.52) | 9.73 (5.13, 18.44)  |                   |
| ≥40                      | Reference        | 2.80 (1.63, 4.81) | 7.59 (3.77, 15.30)  |                   |
| Location                 |                  |                   |                     | 0.423             |
| Urban                    | Reference        | 3.04 (2.51, 3.68) | 7.24 (5.70, 9.19)   |                   |
| Rural                    | Reference        | 2.43 (1.36, 4.33) | 5.75 (2.49, 13.26)  |                   |
| Education                |                  |                   |                     | 0.037*            |
| High school and below    | Reference        | 2.91 (2.04, 4.16) | 10.97 (6.61, 18.22) |                   |
| Bachelor's degree        | Reference        | 3.12 (2.49, 3.92) | 7.02 (5.30, 9.30)   |                   |
| Master's degree          | Reference        | 2.49 (1.28, 4.85) | 3.88 (1.84, 8.17)   |                   |
| Relationship status      |                  |                   |                     | 0.645             |
| Without partner          | Reference        | 3.15 (2.13, 4.65) | 7.55 (4.44, 12.83)  |                   |
| With partner             | Reference        | 2.92 (2.37, 3.60) | 6.87 (5.33, 8.87)   |                   |
| Smoking                  |                  |                   |                     | <0.001*           |
| No                       | Reference        | 2.94 (2.42, 3.57) | 6.60 (5.15, 8.45)   |                   |
| Yes                      | Reference        | 3.57 (2.09, 6.09) | 10.47 (5.60, 19.57) |                   |
| Drinking                 |                  |                   |                     | 0.513             |
| No                       | Reference        | 3.24 (2.56, 4.12) | 6.59 (4.82, 9.01)   |                   |
| Yes                      | Reference        | 2.59 (1.95, 3.45) | 7.26 (5.18, 10.18)  |                   |
| Chronic disease          |                  |                   |                     | 0.445             |
| No                       | Reference        | 2.87 (2.31, 3.56) | 7.05 (5.28, 9.41)   |                   |
| Yes                      | Reference        | 3.10 (2.23, 4.33) | 6.94 (4.74, 10.17)  |                   |
| Perceived susceptibility |                  |                   |                     | 0.704             |
| Low                      | Reference        | 2.87 (2.20, 3.74) | 7.10 (5.06, 9.97)   |                   |
| Moderate                 | Reference        | 3.14 (2.36, 4.17) | 7.47 (5.16, 10.82)  |                   |
| High                     | Reference        | 2.53 (1.47, 4.38) | 5.95 (3.26, 10.86)  |                   |
| Perceived severity       |                  |                   |                     | 0.500             |
| Low                      | Reference        | 3.06 (2.40, 3.90) | 7.47 (5.54, 10.07)  |                   |

|                                     |           |                   |                     |       |
|-------------------------------------|-----------|-------------------|---------------------|-------|
| Moderate                            | Reference | 3.11 (2.28, 4.25) | 8.09 (5.32, 12.30)  |       |
| High                                | Reference | 2.00 (1.08, 3.69) | 3.78 (1.77, 8.08)   |       |
| Time of the most recent vaccination |           |                   |                     | 0.625 |
| <6 months                           | Reference | 2.94 (1.38, 6.29) | 8.11 (3.25, 20.25)  |       |
| 6-12 months                         | Reference | 2.76 (2.08, 3.65) | 6.95 (4.91, 9.85)   |       |
| 12-24 months                        | Reference | 3.19 (2.44, 4.18) | 6.77 (4.80, 9.56)   |       |
| ≥24 months                          | Reference | 2.67 (1.18, 6.04) | 11.14 (3.63, 34.20) |       |
| Self-reported long COVID            |           |                   |                     | 0.427 |
| No                                  | Reference | 2.45 (1.75, 3.43) | 5.14 (3.32, 7.97)   |       |
| Yes                                 | Reference | 3.20 (2.57, 3.98) | 8.03 (6.13, 10.53)  |       |

---

\* A p-value less than 0.05 is considered to be statistically significant.

† “Location” included urban areas (defined as main urban areas, urban–rural junction and peri-urban areas) and rural areas (defined as townships and villages); “high school and below” included high school and below, technical secondary school, junior college and undergraduate student; master candidates were also included in the “Master’s degree”. For “relationship status”, we divided participants into two categories based on the presence or absence of a lover or cohabiting spouse, with married but separated being considered unpartnered.
